# Supplementary material for: Quantification of intracellular N-terminal β-actin arginylation
Source: PubMed Central journal article supplement (PMC6853978; doi:10.1038/s41598-019-52848-5), 2019-11-13
Supplement: 41598_2019_52848_MOESM1_ESM.pdf [file 41598_2019_52848_MOESM1_ESM.pdf]

# **Quantification of intracellular N-terminal $\beta$ -actin arginylation**

Li Chen and Anna Kashina

Supplemental Online Information

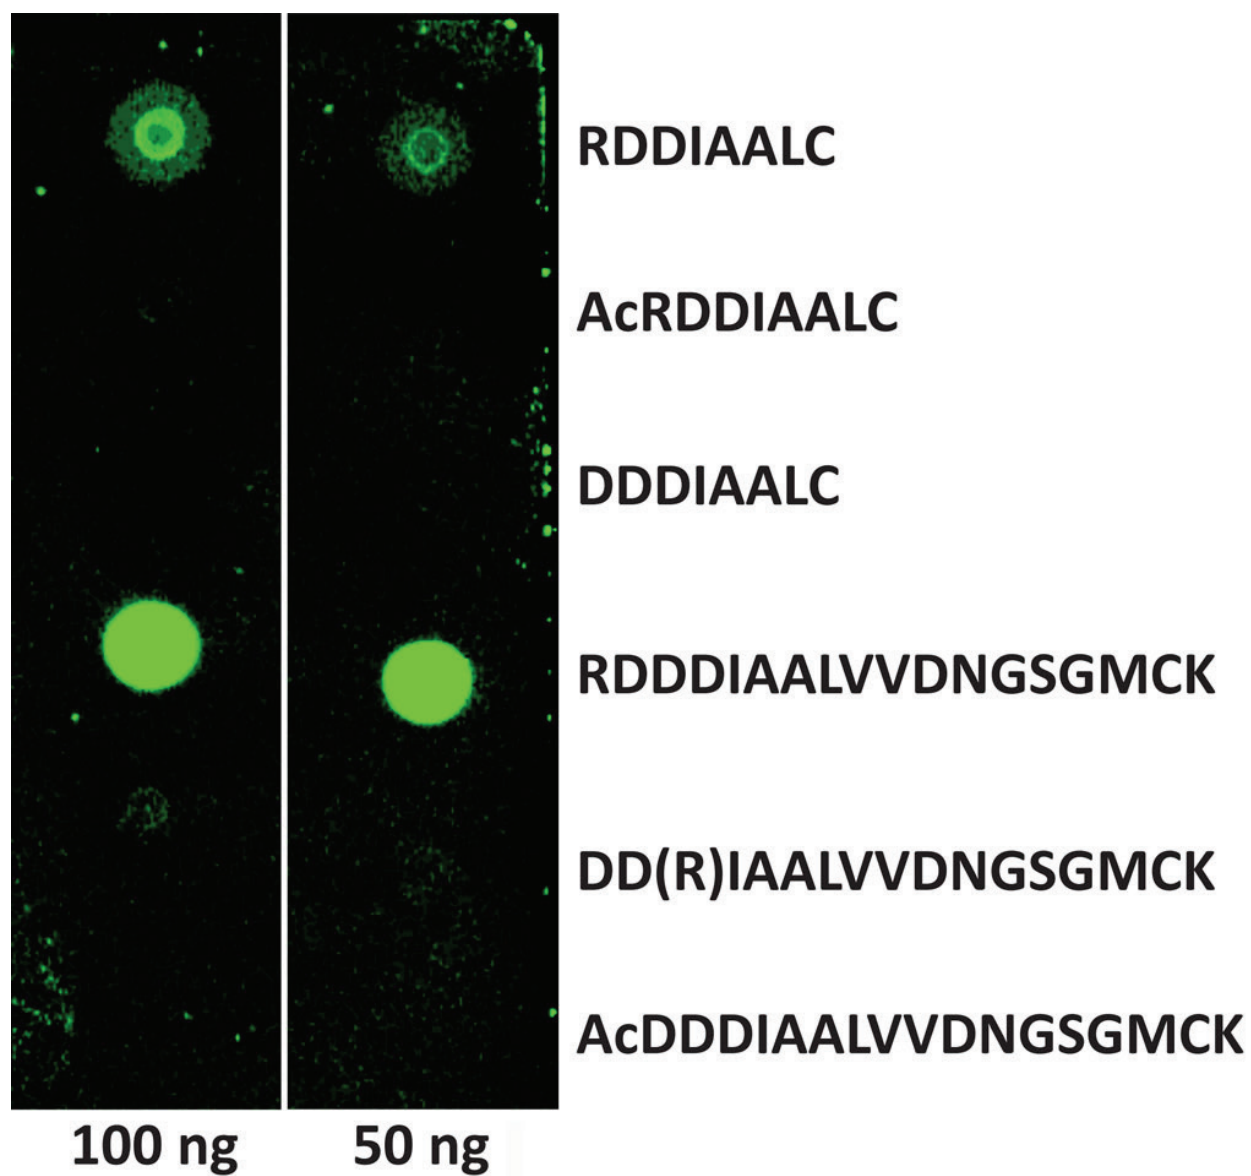

**Figure S1. Antibody to R-actin is highly specific to the N-terminally arginylated actin peptide and does not recognize either N-terminally acetylated or non-acetylated pre-processed  $\beta$ -actin N-terminus.** Western dot blots with R-actin antibodies against spots containing 100 or 50 ng each of synthetic peptides with the sequences indicated on the right. DD(R)... peptide was synthesized with a side chain addition of R to an N-terminal aspartic acid in the  $\beta$ -actin sequence. Longer  $\beta$ -actin peptide appears to have stronger antibody reactivity, potentially due to better presentation of the longer peptide on the nitrocellulose membrane.

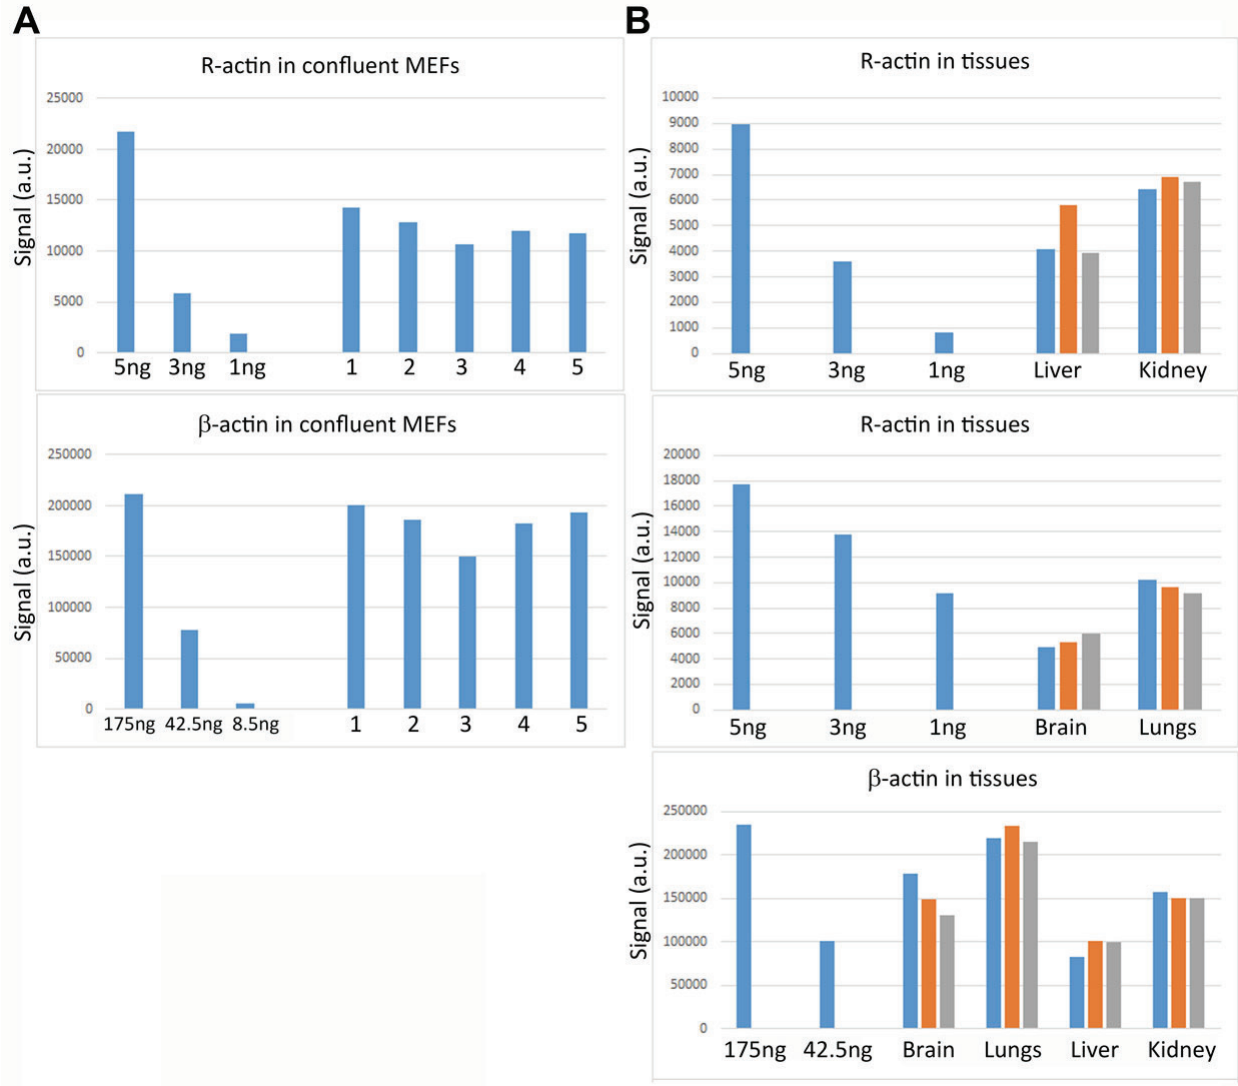

**Figure S2.** Raw data on the antibody signal for the quantifications used in Fig. 1B (A) and Fig. 4 (B).

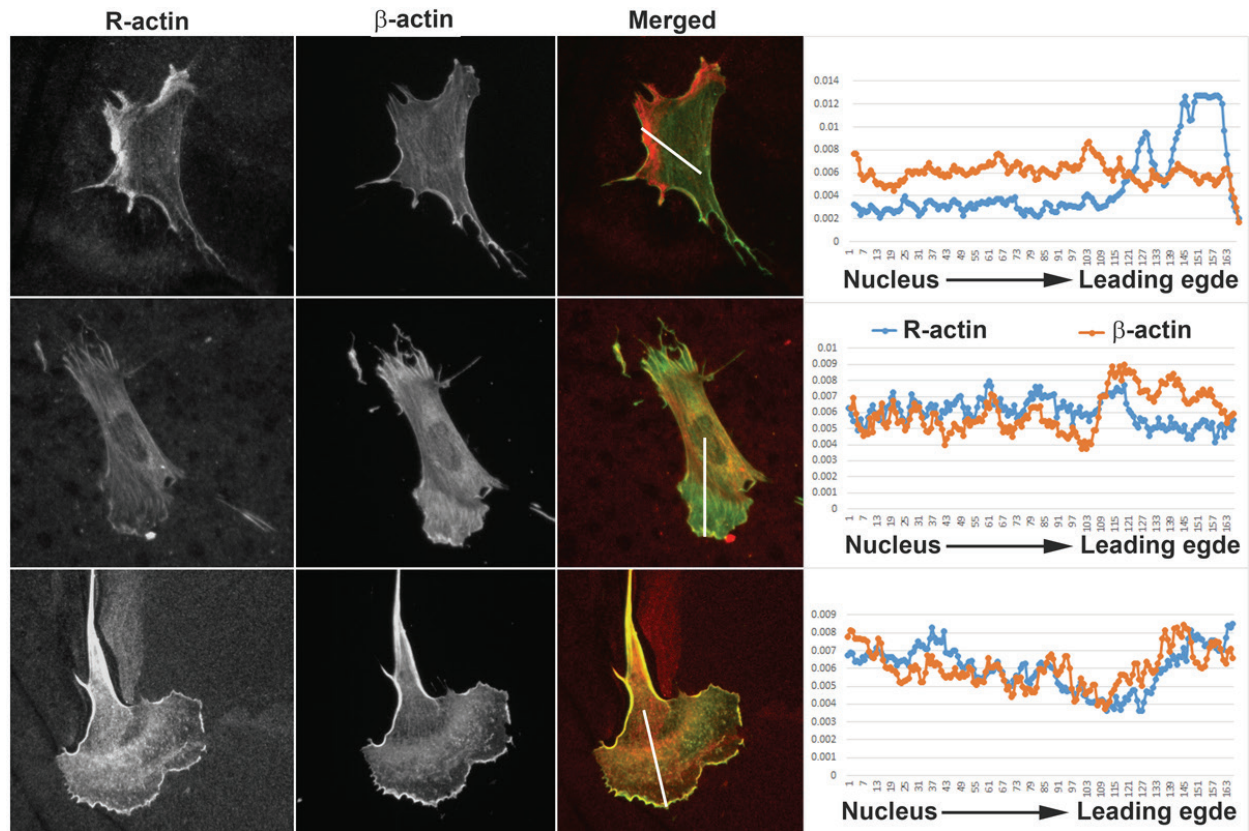

**Figure S3. R-actin in cells exhibits local enrichment patterns that do not always coincide with the distribution of  $\beta$ -actin.** Left, representative images of MEFs co-stained with R-actin and  $\beta$ -actin antibodies as shown. Right, intensity distribution of R-actin (blue) and  $\beta$ -actin (orange) along a line drawn from the cell center toward the periphery. Values on the y axis represent fractions of the total intensity along the line. Three representative cells with different R-actin and  $\beta$ -actin distribution patterns are shown.

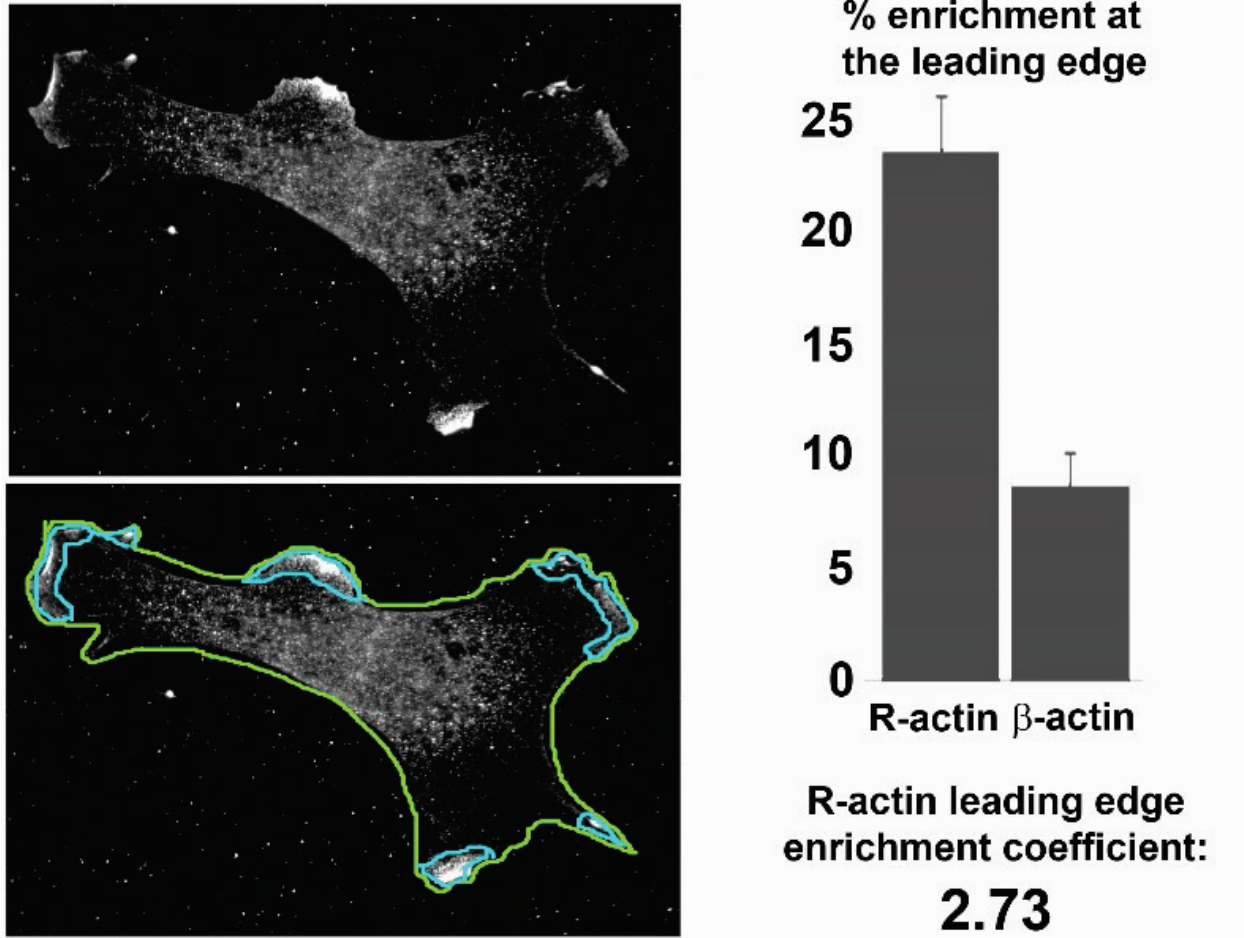

**Figure S4. R-actin highest enrichment at the cell leading edge can account for nearly 25% of the total R-actin and exceed that of  $\beta$ -actin by nearly 3 fold.** Left, representative images of a MEF cell stained with R-actin antibody. Top, raw image. Bottom, the same image with the outline of the whole cell (green) and R-actin-enriched leading edge (blue) used for quantification of R-actin fluorescence in the whole cell and its fraction at the leading edge, respectively. Right, percent enrichment of R-actin and  $\beta$ -actin at the cell leading edge, calculated from images similar for those shown on the left for R-actin, and cells independently stained with antibodies to  $\beta$ -actin (not shown). Five cells with the highest R-actin enrichment were used to calculate the “best case” percentage shown in the chart. Five cells of similar morphology were used to calculate the corresponding  $\beta$ -actin distribution. R-actin leading edge enrichment coefficient was calculated by dividing R-actin leading edge percentage (approximately 23%) by  $\beta$ -actin leading edge percentage (approximately 8%).
